# Supplementary material
Source: HighWire-hosted journal article supplement (https://bmjopen.bmj.com/content/12/3/e057024)
Supplement: inline-supplementary-material-1 [file inline-supplementary-material-1.pdf]

**Dietary Supplements to Reduce Symptom Severity and Duration in People with SARS-CoV-2: Study Protocol for a Randomized, Double Blind, Placebo Controlled Clinical Trial**

**Supplementary Materials**

Table of Contents

| <b>SECTION</b> | <b>TITLE</b>                     |
|----------------|----------------------------------|
| <i>1.0</i>     | <i>Data Validation Plan</i>      |
| <i>2.0</i>     | <i>Protocol Revision History</i> |

Table S1: Study Validation Template

| <b>Dietary Supplements for COVID-19: Data Validation Plan</b>                                                                                                                                                     | <b>Tester</b> | <b>Test Date</b> | <b>Verifier</b> | <b>Verification Date</b> |
|-------------------------------------------------------------------------------------------------------------------------------------------------------------------------------------------------------------------|---------------|------------------|-----------------|--------------------------|
| Data Entry and Correctness: Correct data types for fields. No unbounded or missing data, and no extra points where the field is limiting.                                                                         |               |                  |                 |                          |
| Data Entry Tracking: Shown at the bottom of every form in the electronic database field. This includes original data entry and future corrections.                                                                |               |                  |                 |                          |
| Security: Only authorized personnel with access to the network can access this password-protected file. Limitations will also be tested.                                                                          |               |                  |                 |                          |
| Software and Hardware Verification: Certified and tested on both Windows 7 and 10 to ensure compatibility                                                                                                         |               |                  |                 |                          |
| <b>Functional Tests</b>                                                                                                                                                                                           |               |                  |                 |                          |
| Normal or Expected Conditions Test: Tests must be performed on all critical variables.                                                                                                                            |               |                  |                 |                          |
| Abnormal or Unexpected Conditions Test: Unexpected values, or invalid data entry error messages, must be clear and shown to the user. Skipping rules, warnings, and error messages must be documented and tested. |               |                  |                 |                          |
| Branches, Data Flow, and Combinations of Inputs Test: includes navigation through the database.                                                                                                                   |               |                  |                 |                          |
| Stress Situations: performed to account for multiple users accessing the database at the same time: no overlapping, duplication, or crashing.                                                                     |               |                  |                 |                          |
| <b>Structural Tests</b>                                                                                                                                                                                           |               |                  |                 |                          |
| Structural tests will be performed manually by the research team. Data exports will be checked for accuracy to the eCRF. This process will be individually documented.                                            |               |                  |                 |                          |

## 2.0 Protocol Revision Chronology

Table S2: Protocol Revision Chronology

| Version                           | Changes                                                                                                                                                                                                                                                                                                                                                                                                                                             |
|-----------------------------------|-----------------------------------------------------------------------------------------------------------------------------------------------------------------------------------------------------------------------------------------------------------------------------------------------------------------------------------------------------------------------------------------------------------------------------------------------------|
| 1 - 2021-01-29                    | Original Protocol                                                                                                                                                                                                                                                                                                                                                                                                                                   |
| 2 - 2021-04-16                    | <ul style="list-style-type: none"><li>• Sponsor changed to Ottawa Hospital Research Institute (OHRI)</li><li>• Allowed participants to take unused product to their local pharmacy for destruction</li><li>• Added concomitant medications and stopping rules</li><li>• Signatures now obtained through Adobe Sign</li></ul>                                                                                                                        |
| 3 – 2021-05-04 (current protocol) | <ul style="list-style-type: none"><li>• Added eligibility criteria: participants must be tested by RT-PCR, participants must not have allergy to product ingredients</li><li>• Added procedures for standard of care and hospitalization</li><li>• Added official table for schedule of events</li><li>• Indicated primary analysis in intention to treat</li><li>• Added apparent decrease in uric acid levels as expected adverse event</li></ul> |
